# Supplementary material
Source: publisher figshare collection journal article supplement (https://sage.figshare.com/ndownloader/files/20152559)
Supplement: Supplementary file 1 [file 20152559]

## Sheet: House
HOUSE VARIABLES	DESCRIPTION	SOURCE (where applicable)
NameFull	Full name of sponsor
Cong	Congress
MemberID	PooleID-Congress-Party
BillID	Congress-Type-Number
BillNo	Bill Number
BillType	HR=House bill; S=Senate bill
Title	Short description scanned from the House and Senate Journals (1947-72; Last version of title from http://thomas.loc.gov (1973-present)	http://thomas.loc.gov
Major	Policy Agendas major topic	http://www.policyagendas.org/codebooks/index.html#topics
Subtopic	Policy Agendas subtopic	http://www.policyagendas.org/codebooks/index.html#topics
ByReq	Introduced by request (1973-present only from http:thomas.loc.gov)	http://thomas.loc.gov
Chamber	House or Senate
Commem	Commemorative bill (assigned by our coders to bills that name buildings, coin commemorative medals, designate non-official memorials days etc)
Cosponsr	Number of cosponsors	http://thomas.loc.gov
Year	Year introduced	http://thomas.loc.gov
Month	Month introduced	http://thomas.loc.gov
IntrDate	Day-Month-Year
MRef	Did the sponsor serve on a committeee to which the bill was referred?
Mult	Was the bill referred to more than one committee?
MultNo	How many committees?
PassH	Did the bill pass the House?	http://thomas.loc.gov
Notes
PassS	Did the bill pass the Senate?	http://thomas.loc.gov
PLaw	Did the bill become law? Note that because only the House or Senate version of a bill can become law, the law success rate is much low than the chamber pass rate	http://thomas.loc.gov
PLawDate	When did the bill become law?	http://thomas.loc.gov
PLawNo	Public Law number	http://thomas.loc.gov
Private	Private Bill (private bills are directed towards specific individuals or organizations and should be excluded from most analyses)	http://thomas.loc.gov
Refer102	Referred to the Committee on Agriculture	http://www.policyagendas.org/codebooks/house.html
Refer103	Referred to the Committee on Appropriations	http://www.policyagendas.org/codebooks/house.html
Refer104	Referred to the Committee on Armed Services	http://www.policyagendas.org/codebooks/house.html
Refer105	Referred to the Committee on Banking	http://www.policyagendas.org/codebooks/house.html
Refer106	Referred to the Committee on Budget	http://www.policyagendas.org/codebooks/house.html
Refer107	Referred to the Committee on Government Reform	http://www.policyagendas.org/codebooks/house.html
Refer108	Referred to the Committee on Education	http://www.policyagendas.org/codebooks/house.html
Refer109	Referred to the Committee on Commerce	http://www.policyagendas.org/codebooks/house.html
Refer110	Referred to the Committee on International Relations	http://www.policyagendas.org/codebooks/house.html
Refer111	Referred to the Committee on Government Reform	http://www.policyagendas.org/codebooks/house.html
Refer112	Referred to the Committee on House Administration	http://www.policyagendas.org/codebooks/house.html
Refer114	Referred to the Committee on Resources	http://www.policyagendas.org/codebooks/house.html
Refer115	Referred to the Committee on Judiciary	http://www.policyagendas.org/codebooks/house.html
Refer116	Referred to the Committee on Merchant Marine and Fisheries	http://www.policyagendas.org/codebooks/house.html
Refer117	Referred to the Committee on Post Office and Civil Service	http://www.policyagendas.org/codebooks/house.html
Refer118	Referred to the Committee on Transportation and Infrastructure	http://www.policyagendas.org/codebooks/house.html
Refer119	Referred to the Committee on Rules	http://www.policyagendas.org/codebooks/house.html
Refer120	Referred to the Committee on Science	http://www.policyagendas.org/codebooks/house.html
Refer121	Referred to the Committee on Small Business	http://www.policyagendas.org/codebooks/house.html
Refer122	Referred to the Committee on Standards	http://www.policyagendas.org/codebooks/house.html
Refer123	Referred to the Committee on Veterans	http://www.policyagendas.org/codebooks/house.html
Refer124	Referred to the Committee on Ways and Means	http://www.policyagendas.org/codebooks/house.html
Refer125	Referred to the Committee on Un-American Activities
Refer150	Referred to the Select Aging Committee
Refer151	Referred to the Select Committee on Intelligence	http://www.policyagendas.org/codebooks/house.html
Refer152	Referred to the Select Committee on Children, Youth and Families	http://www.policyagendas.org/codebooks/house.html
Refer153	Referred to the Select Committee on Hunger	http://www.policyagendas.org/codebooks/house.html
Refer154	Referred to the Select Committee on Narcotics Abuse	http://www.policyagendas.org/codebooks/house.html
Refer308
ReportH	Reported to the House by a committee	http://thomas.loc.gov
ReportS	Reported to the Senate by a committee	http://thomas.loc.gov
Veto	Vetoed by President	http://thomas.loc.gov
Age	Age of Sponsor	http://cstl-cla.semo.edu/Renka/PRG/Data/Codebook.doc
CumHServ	Cumulative years served in House	http://cstl-cla.semo.edu/Renka/PRG/Data/Codebook.doc
CumSServ	Cumulative years served in Senate	http://cstl-cla.semo.edu/Renka/PRG/Data/Codebook.doc
Delegate	Sponsor is a delegate of a territory or district	http://cstl-cla.semo.edu/Renka/PRG/Data/Codebook.doc
District	Congressional district of sponsor	http://cstl-cla.semo.edu/Renka/PRG/Data/Codebook.doc
DW1	DW-Nominate 1st dimension	http://www.voteview.com
DW2	DW-Nominate 2nd dimension	http://www.voteview.com
FrstConH	First Congress served - House	http://cstl-cla.semo.edu/Renka/PRG/Data/Codebook.doc
Gender	Gender of sponsor	http://cstl-cla.semo.edu/Renka/PRG/Data/Codebook.doc
ICPSRNo	Poole and Rosenthal's improved ICPSR codes	http://www.voteview.com
Majority	Sponsor is member of majority party	http://cstl-cla.semo.edu/Renka/PRG/Data/Codebook.doc
NameFrst	First name of sponsor	http://cstl-cla.semo.edu/Renka/PRG/Data/Codebook.doc
NameLast	Last name of sponsor	http://cstl-cla.semo.edu/Renka/PRG/Data/Codebook.doc
Party	Party of Sponsor (100=Democrat, 200=Republican, plus others)	http://cstl-cla.semo.edu/Renka/PRG/Data/Codebook.doc
Postal	Postal code of district	http://cstl-cla.semo.edu/Renka/PRG/Data/Codebook.doc
State	State of sponsor	http://cstl-cla.semo.edu/Renka/PRG/Data/Codebook.doc
NotesBio
ComChr	Sponsor chairs a committee
ComC102	Sponsor chairs Committee on Agriculture	http://web.mit.edu/17.251/www/data_page.html
ComC103	Sponsor chairs Committee on Appropriations	http://web.mit.edu/17.251/www/data_page.html
ComC104	Sponsor chairs Committee on Armed Services	http://web.mit.edu/17.251/www/data_page.html
ComC105	Sponsor chairs Committee on Banking	http://web.mit.edu/17.251/www/data_page.html
ComC106	Sponsor chairs Committee on Budget	http://web.mit.edu/17.251/www/data_page.html
ComC107	Sponsor chairs Committee on Government Reform	http://web.mit.edu/17.251/www/data_page.html
ComC108	Sponsor chairs Committee on Education	http://web.mit.edu/17.251/www/data_page.html
ComC109	Sponsor chairs Committee on Commerce	http://web.mit.edu/17.251/www/data_page.html
ComC110	Sponsor chairs Committee on International Relations	http://web.mit.edu/17.251/www/data_page.html
ComC111	Sponsor chairs Committee on Government Reform	http://web.mit.edu/17.251/www/data_page.html
ComC112	Sponsor chairs Committee on House Administration	http://web.mit.edu/17.251/www/data_page.html
ComC114	Sponsor chairs Committee on Resources	http://web.mit.edu/17.251/www/data_page.html
ComC115	Sponsor chairs Committee on Judiciary	http://web.mit.edu/17.251/www/data_page.html
ComC116	Sponsor chairs Committee on Merchant Marine and Fisheries	http://web.mit.edu/17.251/www/data_page.html
ComC117	Sponsor chairs Committee on Post Office and Civil Service	http://web.mit.edu/17.251/www/data_page.html
ComC118	Sponsor chairs Committee on Transportation and Infrastructure	http://web.mit.edu/17.251/www/data_page.html
ComC119	Sponsor chairs Committee on Rules	http://web.mit.edu/17.251/www/data_page.html
ComC120	Sponsor chairs Committee on Science	http://web.mit.edu/17.251/www/data_page.html
ComC121	Sponsor chairs Committee on Small Business	http://web.mit.edu/17.251/www/data_page.html
ComC122	Sponsor chairs Committee on Standards	http://web.mit.edu/17.251/www/data_page.html
ComC123	Sponsor chairs Committee on Veterans	http://web.mit.edu/17.251/www/data_page.html
ComC124	Sponsor chairs Committee on Ways and Means	http://web.mit.edu/17.251/www/data_page.html
ComC125	Sponsor chairs Committee on Un-American Activities	http://web.mit.edu/17.251/www/data_page.html
ComC150	Sponsor chairs Select Aging Committee	http://web.mit.edu/17.251/www/data_page.html
ComC151	Sponsor chairs Select Committee on Intelligence	http://web.mit.edu/17.251/www/data_page.html
ComC152	Sponsor chairs Select Committee on Children, Youth and Families	http://web.mit.edu/17.251/www/data_page.html
ComC153	Sponsor chairs Select Committee on Hunger	http://web.mit.edu/17.251/www/data_page.html
ComC154	Sponsor chairs Select Committee on Narcotics Abuse	http://web.mit.edu/17.251/www/data_page.html
ComC308
ComM102	Sponsor is a member of Committee on Agriculture	http://web.mit.edu/17.251/www/data_page.html
ComM103	Sponsor is a member of Committee on Appropriations	http://web.mit.edu/17.251/www/data_page.html
ComM104	Sponsor is a member of Committee on Armed Services	http://web.mit.edu/17.251/www/data_page.html
ComM105	Sponsor is a member of Committee on Banking	http://web.mit.edu/17.251/www/data_page.html
ComM106	Sponsor is a member of Committee on Budget	http://web.mit.edu/17.251/www/data_page.html
ComM107	Sponsor is a member of Committee on Government Reform	http://web.mit.edu/17.251/www/data_page.html
ComM108	Sponsor is a member of Committee on Education	http://web.mit.edu/17.251/www/data_page.html
ComM109	Sponsor is a member of Committee on Commerce	http://web.mit.edu/17.251/www/data_page.html
ComM110	Sponsor is a member of Committee on International Relations	http://web.mit.edu/17.251/www/data_page.html
ComM111	Sponsor is a member of Committee on Government Reform	http://web.mit.edu/17.251/www/data_page.html
ComM112	Sponsor is a member of Committee on House Administration	http://web.mit.edu/17.251/www/data_page.html
ComM114	Sponsor is a member of Committee on Resources	http://web.mit.edu/17.251/www/data_page.html
ComM115	Sponsor is a member of Committee on Judiciary	http://web.mit.edu/17.251/www/data_page.html
ComM116	Sponsor is a member of Committee on Merchant Marine and Fisheries	http://web.mit.edu/17.251/www/data_page.html
ComM117	Sponsor is a member of Committee on Post Office and Civil Service	http://web.mit.edu/17.251/www/data_page.html
ComM118	Sponsor is a member of Committee on Transportation and Infrastructure	http://web.mit.edu/17.251/www/data_page.html
ComM119	Sponsor is a member of Committee on Rules	http://web.mit.edu/17.251/www/data_page.html
ComM120	Sponsor is a member of Committee on Science	http://web.mit.edu/17.251/www/data_page.html
ComM121	Sponsor is a member of Committee on Small Business	http://web.mit.edu/17.251/www/data_page.html
ComM122	Sponsor is a member of Committee on Standards	http://web.mit.edu/17.251/www/data_page.html
ComM123	Sponsor is a member of Committee on Veterans	http://web.mit.edu/17.251/www/data_page.html
ComM124	Sponsor is a member of Committee on Ways and Means	http://web.mit.edu/17.251/www/data_page.html
ComM125	Sponsor is a member of Committee on Un-American Activities	http://web.mit.edu/17.251/www/data_page.html
ComM150	Sponsor is a member of Select Aging Committee	http://web.mit.edu/17.251/www/data_page.html
ComM151	Sponsor is a member of Select Committee on Intelligence	http://web.mit.edu/17.251/www/data_page.html
ComM152	Sponsor is a member of Select Committee on Children, Youth and Families	http://web.mit.edu/17.251/www/data_page.html
ComM153	Sponsor is a member of Select Committee on Hunger	http://web.mit.edu/17.251/www/data_page.html
ComM154	Sponsor is a member of Select Committee on Narcotics Abuse	http://web.mit.edu/17.251/www/data_page.html
ComM308
ComRMM	Sponsor is Ranking Minority of a Committee
ComR102	Sponsor is Ranking Minority of Committee on Agriculture	http://web.mit.edu/17.251/www/data_page.html
ComR103	Sponsor is Ranking Minority of Committee on Appropriations	http://web.mit.edu/17.251/www/data_page.html
ComR104	Sponsor is Ranking Minority of Committee on Armed Services	http://web.mit.edu/17.251/www/data_page.html
ComR105	Sponsor is Ranking Minority of Committee on Banking	http://web.mit.edu/17.251/www/data_page.html
ComR106	Sponsor is Ranking Minority of Committee on Budget	http://web.mit.edu/17.251/www/data_page.html
ComR107	Sponsor is Ranking Minority of Committee on Government Reform	http://web.mit.edu/17.251/www/data_page.html
ComR108	Sponsor is Ranking Minority of Committee on Education	http://web.mit.edu/17.251/www/data_page.html
ComR109	Sponsor is Ranking Minority of Committee on Commerce	http://web.mit.edu/17.251/www/data_page.html
ComR110	Sponsor is Ranking Minority of Committee on International Relations	http://web.mit.edu/17.251/www/data_page.html
ComR111	Sponsor is Ranking Minority of Committee on Government Reform	http://web.mit.edu/17.251/www/data_page.html
ComR112	Sponsor is Ranking Minority of Committee on House Administration	http://web.mit.edu/17.251/www/data_page.html
ComR114	Sponsor is Ranking Minority of Committee on Resources	http://web.mit.edu/17.251/www/data_page.html
ComR115	Sponsor is Ranking Minority of Committee on Judiciary	http://web.mit.edu/17.251/www/data_page.html
ComR116	Sponsor is Ranking Minority of Committee on Merchant Marine and Fisheries	http://web.mit.edu/17.251/www/data_page.html
ComR117	Sponsor is Ranking Minority of Committee on Post Office and Civil Service	http://web.mit.edu/17.251/www/data_page.html
ComR118	Sponsor is Ranking Minority of Committee on Transportation and Infrastructure	http://web.mit.edu/17.251/www/data_page.html
ComR119	Sponsor is Ranking Minority of Committee on Rules	http://web.mit.edu/17.251/www/data_page.html
ComR120	Sponsor is Ranking Minority of Committee on Science	http://web.mit.edu/17.251/www/data_page.html
ComR121	Sponsor is Ranking Minority of Committee on Small Business	http://web.mit.edu/17.251/www/data_page.html
ComR122	Sponsor is Ranking Minority of Committee on Standards	http://web.mit.edu/17.251/www/data_page.html
ComR123	Sponsor is Ranking Minority of Committee on Veterans	http://web.mit.edu/17.251/www/data_page.html
ComR124	Sponsor is Ranking Minority of Committee on Ways and Means	http://web.mit.edu/17.251/www/data_page.html
ComR125	Sponsor is Ranking Minority of Committee on Un-American Activities	http://web.mit.edu/17.251/www/data_page.html
ComR150	Sponsor is Ranking Minority of Select Aging Committee	http://web.mit.edu/17.251/www/data_page.html
ComR151	Sponsor is Ranking Minority of Select Committee on Intelligence	http://web.mit.edu/17.251/www/data_page.html
ComR152	Sponsor is Ranking Minority of Select Committee on Children, Youth and Families	http://web.mit.edu/17.251/www/data_page.html
ComR153	Sponsor is Ranking Minority of Select Committee on Hunger	http://web.mit.edu/17.251/www/data_page.html
ComR154	Sponsor is Ranking Minority of Select Committee on Narcotics Abuse	http://web.mit.edu/17.251/www/data_page.html
ComR308
LeadCham	Sponsor is a chamber leader
LeadComm	Sponsor is a committee chair or ranking minority member
LeadSubC	Sponsor is a subcommittee chair or ranking minority member
NotesCom
SubChr	Sponsor chairs a subcommittee
SubC102	Sponsor chairs subcommittee of Committee on Agriculture	http://web.mit.edu/17.251/www/data_page.html
SubC103	Sponsor chairs subcommittee of Committee on Appropriations	http://web.mit.edu/17.251/www/data_page.html
SubC104	Sponsor chairs subcommittee of Committee on Armed Services	http://web.mit.edu/17.251/www/data_page.html
SubC105	Sponsor chairs subcommittee of Committee on Banking	http://web.mit.edu/17.251/www/data_page.html
SubC106	Sponsor chairs subcommittee of Committee on Budget	http://web.mit.edu/17.251/www/data_page.html
SubC107	Sponsor chairs subcommittee of Committee on Government Reform	http://web.mit.edu/17.251/www/data_page.html
SubC108	Sponsor chairs subcommittee of Committee on Education	http://web.mit.edu/17.251/www/data_page.html
SubC109	Sponsor chairs subcommittee of Committee on Commerce	http://web.mit.edu/17.251/www/data_page.html
SubC110	Sponsor chairs subcommittee of Committee on International Relations	http://web.mit.edu/17.251/www/data_page.html
SubC111	Sponsor chairs subcommittee of Committee on Government Reform	http://web.mit.edu/17.251/www/data_page.html
SubC112	Sponsor chairs subcommittee of Committee on House Administration	http://web.mit.edu/17.251/www/data_page.html
SubC114	Sponsor chairs subcommittee of Committee on Resources	http://web.mit.edu/17.251/www/data_page.html
SubC115	Sponsor chairs subcommittee of Committee on Judiciary	http://web.mit.edu/17.251/www/data_page.html
SubC116	Sponsor chairs subcommittee of Committee on Merchant Marine and Fisheries	http://web.mit.edu/17.251/www/data_page.html
SubC117	Sponsor chairs subcommittee of Committee on Post Office and Civil Service	http://web.mit.edu/17.251/www/data_page.html
SubC118	Sponsor chairs subcommittee of Committee on Transportation and Infrastructure	http://web.mit.edu/17.251/www/data_page.html
SubC119	Sponsor chairs subcommittee of Committee on Rules	http://web.mit.edu/17.251/www/data_page.html
SubC120	Sponsor chairs subcommittee of Committee on Science	http://web.mit.edu/17.251/www/data_page.html
SubC121	Sponsor chairs subcommittee of Committee on Small Business	http://web.mit.edu/17.251/www/data_page.html
SubC122	Sponsor chairs subcommittee of Committee on Standards	http://web.mit.edu/17.251/www/data_page.html
SubC123	Sponsor chairs subcommittee of Committee on Veterans	http://web.mit.edu/17.251/www/data_page.html
SubC124	Sponsor chairs subcommittee of Committee on Ways and Means	http://web.mit.edu/17.251/www/data_page.html
SubC125	Sponsor chairs subcommittee of Committee on Un-American Activities	http://web.mit.edu/17.251/www/data_page.html
SubC150	Sponsor chairs subcommittee of Select Aging Committee	http://web.mit.edu/17.251/www/data_page.html
SubC151	Sponsor chairs subcommittee of Select Committee on Intelligence	http://web.mit.edu/17.251/www/data_page.html
SubC152	Sponsor chairs subcommittee of Select Committee on Children, Youth and Families	http://web.mit.edu/17.251/www/data_page.html
SubC153	Sponsor chairs subcommittee of Select Committee on Hunger	http://web.mit.edu/17.251/www/data_page.html
SubC154	Sponsor chairs subcommittee of Select Committee on Narcotics Abuse	http://web.mit.edu/17.251/www/data_page.html
SubC308
SubRMM	Sponsor is Ranking minority of a subcommittee
SubR102	Sponsor is Ranking minority on subcommittee of Committee on Agriculture	http://web.mit.edu/17.251/www/data_page.html
SubR103	Sponsor is Ranking minority on subcommittee of Committee on Appropriations	http://web.mit.edu/17.251/www/data_page.html
SubR104	Sponsor is Ranking minority on subcommittee of Committee on Armed Services	http://web.mit.edu/17.251/www/data_page.html
SubR105	Sponsor is Ranking minority on subcommittee of Committee on Banking	http://web.mit.edu/17.251/www/data_page.html
SubR106	Sponsor is Ranking minority on subcommittee of Committee on Budget	http://web.mit.edu/17.251/www/data_page.html
SubR107	Sponsor is Ranking minority on subcommittee of Committee on Government Reform	http://web.mit.edu/17.251/www/data_page.html
SubR108	Sponsor is Ranking minority on subcommittee of Committee on Education	http://web.mit.edu/17.251/www/data_page.html
SubR109	Sponsor is Ranking minority on subcommittee of Committee on Commerce	http://web.mit.edu/17.251/www/data_page.html
SubR110	Sponsor is Ranking minority on subcommittee of Committee on International Relations	http://web.mit.edu/17.251/www/data_page.html
SubR111	Sponsor is Ranking minority on subcommittee of Committee on Government Reform	http://web.mit.edu/17.251/www/data_page.html
SubR112	Sponsor is Ranking minority on subcommittee of Committee on House Administration	http://web.mit.edu/17.251/www/data_page.html
SubR114	Sponsor is Ranking minority on subcommittee of Committee on Resources	http://web.mit.edu/17.251/www/data_page.html
SubR115	Sponsor is Ranking minority on subcommittee of Committee on Judiciary	http://web.mit.edu/17.251/www/data_page.html
SubR116	Sponsor is Ranking minority on subcommittee of Committee on Merchant Marine and Fisheries	http://web.mit.edu/17.251/www/data_page.html
SubR117	Sponsor is Ranking minority on subcommittee of Committee on Post Office and Civil Service	http://web.mit.edu/17.251/www/data_page.html
SubR118	Sponsor is Ranking minority on subcommittee of Committee on Transportation and Infrastructure	http://web.mit.edu/17.251/www/data_page.html
SubR119	Sponsor is Ranking minority on subcommittee of Committee on Rules	http://web.mit.edu/17.251/www/data_page.html
SubR120	Sponsor is Ranking minority on subcommittee of Committee on Science	http://web.mit.edu/17.251/www/data_page.html
SubR121	Sponsor is Ranking minority on subcommittee of Committee on Small Business	http://web.mit.edu/17.251/www/data_page.html
SubR122	Sponsor is Ranking minority on subcommittee of Committee on Standards	http://web.mit.edu/17.251/www/data_page.html
SubR123	Sponsor is Ranking minority on subcommittee of Committee on Veterans	http://web.mit.edu/17.251/www/data_page.html
SubR124	Sponsor is Ranking minority on subcommittee of Committee on Ways and Means	http://web.mit.edu/17.251/www/data_page.html
SubR125	Sponsor is Ranking minority on subcommittee of Committee on Un-American Activities	http://web.mit.edu/17.251/www/data_page.html
SubR150	Sponsor is Ranking minority on subcommittee of Select Aging Committee	http://web.mit.edu/17.251/www/data_page.html
SubR151	Sponsor is Ranking minority on subcommittee of Select Committee on Intelligence	http://web.mit.edu/17.251/www/data_page.html
SubR152	Sponsor is Ranking minority on subcommittee of Select Committee on Children, Youth and Families	http://web.mit.edu/17.251/www/data_page.html
SubR153	Sponsor is Ranking minority on subcommittee of Select Committee on Hunger	http://web.mit.edu/17.251/www/data_page.html
SubR154	Sponsor is Ranking minority on subcommittee of Select Committee on Narcotics Abuse	http://web.mit.edu/17.251/www/data_page.html
SubR308

## Sheet: Senate
SENATE VARIABLES	DESCRIPTION	SOURCE (where applicable)
NameFull	Full name of sponsor
Cong	Congress
MemberID	PooleID-Congress-Party
BillID	Congress-Type-Number
BillNo	Bill Number
BillType	HR=House bill; S=Senate bill
Title	Short description scanned from the House and Senate Journals (1947-72; Last version of title from http://thomas.loc.gov (1973-present)	http://thomas.loc.gov
Major	Policy Agendas major topic	http://www.policyagendas.org/codebooks/index.html#topics
Subtopic	Policy Agendas subtopic	http://www.policyagendas.org/codebooks/index.html#topics
ByReq	Introduced by request (1973-present only from http:thomas.loc.gov)	http://thomas.loc.gov
Chamber	House or Senate
Commem	Commemorative bill (assigned by our coders to bills that name buildings, coin commemorative medals, designate non-official memorials days etc)
Cosponsr	Number of cosponsors	http://thomas.loc.gov
Year	Year introduced	http://thomas.loc.gov
Month	Month introduced	http://thomas.loc.gov
IntrDate	Day-Month-Year
MRef	Did the sponsor serve on a committeee to which the bill was referred?
Mult	Was the bill referred to more than one committee?
MultNo	How many committees?
Notes
PassH	Did the bill pass the House?	http://thomas.loc.gov
PassS	Did the bill pass the Senate?	http://thomas.loc.gov
PLaw	Did the bill become law? Note that because only the House or Senate version of a bill can become law, the law success rate is much low than the chamber pass rate	http://thomas.loc.gov
PLawDate	When did the bill become law?	http://thomas.loc.gov
PLawNo	Public Law number	http://thomas.loc.gov
Private	Private Bill (private bills are directed towards specific individuals or organizations and should be excluded from most analyses)	http://thomas.loc.gov
Refer202	Referred to the Committee on Agriculture	http://www.policyagendas.org/codebooks/senate.html
Refer203	Referred to the Committee on Appropriations	http://www.policyagendas.org/codebooks/senate.html
Refer204	Referred to the Committee on Armed Services	http://www.policyagendas.org/codebooks/senate.html
Refer205	Referred to the Committee on Banking, Housing and Urban Affairs	http://www.policyagendas.org/codebooks/senate.html
Refer206	Referred to the Committee on Budget	http://www.policyagendas.org/codebooks/senate.html
Refer207	Referred to the Committee on Commerce, Science and Transportation	http://www.policyagendas.org/codebooks/senate.html
Refer208	Referred to the Committee on Energy and Natural Resources	http://www.policyagendas.org/codebooks/senate.html
Refer209	Referred to the Committee on Environment and Public Works	http://www.policyagendas.org/codebooks/senate.html
Refer211	Referred to the Committee on Finance	http://www.policyagendas.org/codebooks/senate.html
Refer212	Referred to the Committee on Foreign Relations	http://www.policyagendas.org/codebooks/senate.html
Refer213	Referred to the Committee on Governmental Affairs	http://www.policyagendas.org/codebooks/senate.html
Refer216	Referred to the Committee on Judiciary	http://www.policyagendas.org/codebooks/senate.html
Refer217	Referred to the Committee on Health, Education, and Labor	http://www.policyagendas.org/codebooks/senate.html
Refer218	Referred to the Committee on Rules and Administration	http://www.policyagendas.org/codebooks/senate.html
Refer219	Referred to the Committee on Small Business	http://www.policyagendas.org/codebooks/senate.html
Refer220	Referred to the Committee on Veterans	http://www.policyagendas.org/codebooks/senate.html
Refer224	Referred to the Committee on Aeronautics and Space Science	http://www.policyagendas.org/codebooks/senate.html
Refer228	Referred to the Committee Post Office and Civil Service	http://www.policyagendas.org/codebooks/senate.html
Refer229	Referred to the Committee on District of Columbia	http://www.policyagendas.org/codebooks/senate.html
Refer250	Referred to the Special Committee on Aging	http://www.policyagendas.org/codebooks/senate.html
Refer251	Referred to the Select Committee on Ethics	http://www.policyagendas.org/codebooks/senate.html
Refer252	Referred to the Select Committee on Indian Affairs	http://www.policyagendas.org/codebooks/senate.html
Refer253	Referred to the Select Committee on Intelligence	http://www.policyagendas.org/codebooks/senate.html
Refer308
ReportH	Reported to the House by a committee	http://thomas.loc.gov
ReportS	Reported to the Senate by a committee	http://thomas.loc.gov
Veto	Vetoed by President	http://thomas.loc.gov
Age	Age of Sponsor	http://cstl-cla.semo.edu/Renka/PRG/Data/Codebook.doc
Class	Cumulative years served in House	http://cstl-cla.semo.edu/Renka/PRG/Data/Codebook.doc
CumHServ	Cumulative years served in Senate	http://cstl-cla.semo.edu/Renka/PRG/Data/Codebook.doc
CumSServ	Sponsor is a delegate of a territory or district	http://cstl-cla.semo.edu/Renka/PRG/Data/Codebook.doc
Delegate	Congressional district of sponsor	http://cstl-cla.semo.edu/Renka/PRG/Data/Codebook.doc
DW1	DW-Nominate 1st dimension	http://www.voteview.com
DW2	DW-Nominate 2nd dimension	http://www.voteview.com
FrstConS	First Congress served - House	http://cstl-cla.semo.edu/Renka/PRG/Data/Codebook.doc
Gender	Gender of sponsor	http://cstl-cla.semo.edu/Renka/PRG/Data/Codebook.doc
ICPSRNo	Poole and Rosenthal's improved ICPSR codes	http://www.voteview.com
Majority	Sponsor is member of majority party	http://cstl-cla.semo.edu/Renka/PRG/Data/Codebook.doc
NameFrst	First name of sponsor	http://cstl-cla.semo.edu/Renka/PRG/Data/Codebook.doc
NameLast	Last name of sponsor	http://cstl-cla.semo.edu/Renka/PRG/Data/Codebook.doc
Party	Party of Sponsor (100=Republican, 200=Democrat, plus others)	http://cstl-cla.semo.edu/Renka/PRG/Data/Codebook.doc
Postal	Postal code of district	http://cstl-cla.semo.edu/Renka/PRG/Data/Codebook.doc
State	State of sponsor	http://cstl-cla.semo.edu/Renka/PRG/Data/Codebook.doc
NotesBio
ComChr	Sponsor chairs a committee
ComC202	Sponsor chairs Committee on Agriculture	http://www.policyagendas.org/codebooks/senate.html
ComC203	Sponsor chairs Committee on Appropriations	http://www.policyagendas.org/codebooks/senate.html
ComC204	Sponsor chairs Committee on Armed Services	http://www.policyagendas.org/codebooks/senate.html
ComC205	Sponsor chairs Committee on Banking, Housing and Urban Affairs	http://www.policyagendas.org/codebooks/senate.html
ComC206	Sponsor chairs Committee on Budget	http://www.policyagendas.org/codebooks/senate.html
ComC207	Sponsor chairs Committee on Commerce, Science and Transportation	http://www.policyagendas.org/codebooks/senate.html
ComC208	Sponsor chairs Committee on Energy and Natural Resources	http://www.policyagendas.org/codebooks/senate.html
ComC209	Sponsor chairs Committee on Environment and Public Works	http://www.policyagendas.org/codebooks/senate.html
ComC211	Sponsor chairs Committee on Finance	http://www.policyagendas.org/codebooks/senate.html
ComC212	Sponsor chairs Committee on Foreign Relations	http://www.policyagendas.org/codebooks/senate.html
ComC213	Sponsor chairs Committee on Governmental Affairs	http://www.policyagendas.org/codebooks/senate.html
ComC216	Sponsor chairs Committee on Judiciary	http://www.policyagendas.org/codebooks/senate.html
ComC217	Sponsor chairs Committee on Health, Education, and Labor	http://www.policyagendas.org/codebooks/senate.html
ComC218	Sponsor chairs Committee on Rules and Administration	http://www.policyagendas.org/codebooks/senate.html
ComC219	Sponsor chairs Committee on Small Business	http://www.policyagendas.org/codebooks/senate.html
ComC220	Sponsor chairs Committee on Veterans	http://www.policyagendas.org/codebooks/senate.html
ComC224	Sponsor chairs Committee on Aeronautics and Space Science	http://www.policyagendas.org/codebooks/senate.html
ComC228	Sponsor chairs Committee Post Office and Civil Service	http://www.policyagendas.org/codebooks/senate.html
ComC229	Sponsor chairs Committee on District of Columbia	http://www.policyagendas.org/codebooks/senate.html
ComC250	Sponsor chairs Special Committee on Aging	http://www.policyagendas.org/codebooks/senate.html
ComC251	Sponsor chairs Select Committee on Ethics	http://www.policyagendas.org/codebooks/senate.html
ComC252	Sponsor chairs Select Committee on Indian Affairs	http://www.policyagendas.org/codebooks/senate.html
ComC253	Sponsor chairs Select Committee on Intelligence	http://www.policyagendas.org/codebooks/senate.html
ComM202	Sponsor is a member of Committee on Agriculture	http://www.policyagendas.org/codebooks/senate.html
ComM203	Sponsor is a member of Committee on Appropriations	http://www.policyagendas.org/codebooks/senate.html
ComM204	Sponsor is a member of Committee on Armed Services	http://www.policyagendas.org/codebooks/senate.html
ComM205	Sponsor is a member of Committee on Banking, Housing and Urban Affairs	http://www.policyagendas.org/codebooks/senate.html
ComM206	Sponsor is a member of Committee on Budget	http://www.policyagendas.org/codebooks/senate.html
ComM207	Sponsor is a member of Committee on Commerce, Science and Transportation	http://www.policyagendas.org/codebooks/senate.html
ComM208	Sponsor is a member of Committee on Energy and Natural Resources	http://www.policyagendas.org/codebooks/senate.html
ComM209	Sponsor is a member of Committee on Environment and Public Works	http://www.policyagendas.org/codebooks/senate.html
ComM211	Sponsor is a member of Committee on Finance	http://www.policyagendas.org/codebooks/senate.html
ComM212	Sponsor is a member of Committee on Foreign Relations	http://www.policyagendas.org/codebooks/senate.html
ComM213	Sponsor is a member of Committee on Governmental Affairs	http://www.policyagendas.org/codebooks/senate.html
ComM216	Sponsor is a member of Committee on Judiciary	http://www.policyagendas.org/codebooks/senate.html
ComM217	Sponsor is a member of Committee on Health, Education, and Labor	http://www.policyagendas.org/codebooks/senate.html
ComM218	Sponsor is a member of Committee on Rules and Administration	http://www.policyagendas.org/codebooks/senate.html
ComM219	Sponsor is a member of Committee on Small Business	http://www.policyagendas.org/codebooks/senate.html
ComM220	Sponsor is a member of Committee on Veterans	http://www.policyagendas.org/codebooks/senate.html
ComM224	Sponsor is a member of Committee on Aeronautics and Space Science	http://www.policyagendas.org/codebooks/senate.html
ComM228	Sponsor is a member of Committee Post Office and Civil Service	http://www.policyagendas.org/codebooks/senate.html
ComM229	Sponsor is a member of Committee on District of Columbia	http://www.policyagendas.org/codebooks/senate.html
ComM250	Sponsor is a member of Special Committee on Aging	http://www.policyagendas.org/codebooks/senate.html
ComM251	Sponsor is a member of Select Committee on Ethics	http://www.policyagendas.org/codebooks/senate.html
ComM252	Sponsor is a member of Select Committee on Indian Affairs	http://www.policyagendas.org/codebooks/senate.html
ComM253	Sponsor is a member of Select Committee on Intelligence	http://www.policyagendas.org/codebooks/senate.html
ComRMM	Sponsor is Ranking minority on a committee
ComR202	Sponsor is Ranking Minority of Committee on Agriculture	http://www.policyagendas.org/codebooks/senate.html
ComR203	Sponsor is Ranking Minority of Committee on Appropriations	http://www.policyagendas.org/codebooks/senate.html
ComR204	Sponsor is Ranking Minority of Committee on Armed Services	http://www.policyagendas.org/codebooks/senate.html
ComR205	Sponsor is Ranking Minority of Committee on Banking, Housing and Urban Affairs	http://www.policyagendas.org/codebooks/senate.html
ComR206	Sponsor is Ranking Minority of Committee on Budget	http://www.policyagendas.org/codebooks/senate.html
ComR207	Sponsor is Ranking Minority of Committee on Commerce, Science and Transportation	http://www.policyagendas.org/codebooks/senate.html
ComR208	Sponsor is Ranking Minority of Committee on Energy and Natural Resources	http://www.policyagendas.org/codebooks/senate.html
ComR209	Sponsor is Ranking Minority of Committee on Environment and Public Works	http://www.policyagendas.org/codebooks/senate.html
ComR211	Sponsor is Ranking Minority of Committee on Finance	http://www.policyagendas.org/codebooks/senate.html
ComR212	Sponsor is Ranking Minority of Committee on Foreign Relations	http://www.policyagendas.org/codebooks/senate.html
ComR213	Sponsor is Ranking Minority of Committee on Governmental Affairs	http://www.policyagendas.org/codebooks/senate.html
ComR216	Sponsor is Ranking Minority of Committee on Judiciary	http://www.policyagendas.org/codebooks/senate.html
ComR217	Sponsor is Ranking Minority of Committee on Health, Education, and Labor	http://www.policyagendas.org/codebooks/senate.html
ComR218	Sponsor is Ranking Minority of Committee on Rules and Administration	http://www.policyagendas.org/codebooks/senate.html
ComR219	Sponsor is Ranking Minority of Committee on Small Business	http://www.policyagendas.org/codebooks/senate.html
ComR220	Sponsor is Ranking Minority of Committee on Veterans	http://www.policyagendas.org/codebooks/senate.html
ComR224	Sponsor is Ranking Minority of Committee on Aeronautics and Space Science	http://www.policyagendas.org/codebooks/senate.html
ComR228	Sponsor is Ranking Minority of Committee Post Office and Civil Service	http://www.policyagendas.org/codebooks/senate.html
ComR229	Sponsor is Ranking Minority of Committee on District of Columbia	http://www.policyagendas.org/codebooks/senate.html
ComR250	Sponsor is Ranking Minority of Special Committee on Aging	http://www.policyagendas.org/codebooks/senate.html
ComR251	Sponsor is Ranking Minority of Select Committee on Ethics	http://www.policyagendas.org/codebooks/senate.html
ComR252	Sponsor is Ranking Minority of Select Committee on Indian Affairs	http://www.policyagendas.org/codebooks/senate.html
ComR253	Sponsor is Ranking Minority of Select Committee on Intelligence	http://www.policyagendas.org/codebooks/senate.html
LeadCham	Sponsor is a chamber leader
LeadComm	Sponsor is a committee leader
NotesCom
SubChr	Sponsor chairs a subcommittee
SubC202	Sponsor chairs subcommittee of Committee on Agriculture	http://www.policyagendas.org/codebooks/senate.html
SubC203	Sponsor chairs subcommittee of Committee on Appropriations	http://www.policyagendas.org/codebooks/senate.html
SubC204	Sponsor chairs subcommittee of Committee on Armed Services	http://www.policyagendas.org/codebooks/senate.html
SubC205	Sponsor chairs subcommittee of Committee on Banking, Housing and Urban Affairs	http://www.policyagendas.org/codebooks/senate.html
SubC206	Sponsor chairs subcommittee of Committee on Budget	http://www.policyagendas.org/codebooks/senate.html
SubC207	Sponsor chairs subcommittee of Committee on Commerce, Science and Transportation	http://www.policyagendas.org/codebooks/senate.html
SubC208	Sponsor chairs subcommittee of Committee on Energy and Natural Resources	http://www.policyagendas.org/codebooks/senate.html
SubC209	Sponsor chairs subcommittee of Committee on Environment and Public Works	http://www.policyagendas.org/codebooks/senate.html
SubC211	Sponsor chairs subcommittee of Committee on Finance	http://www.policyagendas.org/codebooks/senate.html
SubC212	Sponsor chairs subcommittee of Committee on Foreign Relations	http://www.policyagendas.org/codebooks/senate.html
SubC213	Sponsor chairs subcommittee of Committee on Governmental Affairs	http://www.policyagendas.org/codebooks/senate.html
SubC216	Sponsor chairs subcommittee of Committee on Judiciary	http://www.policyagendas.org/codebooks/senate.html
SubC217	Sponsor chairs subcommittee of Committee on Health, Education, and Labor	http://www.policyagendas.org/codebooks/senate.html
SubC218	Sponsor chairs subcommittee of Committee on Rules and Administration	http://www.policyagendas.org/codebooks/senate.html
SubC219	Sponsor chairs subcommittee of Committee on Small Business	http://www.policyagendas.org/codebooks/senate.html
SubC220	Sponsor chairs subcommittee of Committee on Veterans	http://www.policyagendas.org/codebooks/senate.html
SubC224	Sponsor chairs subcommittee of Committee on Aeronautics and Space Science	http://www.policyagendas.org/codebooks/senate.html
SubC228	Sponsor chairs subcommittee of Committee Post Office and Civil Service	http://www.policyagendas.org/codebooks/senate.html
SubC229	Sponsor chairs subcommittee of Committee on District of Columbia	http://www.policyagendas.org/codebooks/senate.html
SubC250	Sponsor chairs subcommittee of Special Committee on Aging	http://www.policyagendas.org/codebooks/senate.html
SubC251	Sponsor chairs subcommittee of Select Committee on Ethics	http://www.policyagendas.org/codebooks/senate.html
SubC252	Sponsor chairs subcommittee of Select Committee on Indian Affairs	http://www.policyagendas.org/codebooks/senate.html
SubC253	Sponsor chairs subcommittee of Select Committee on Intelligence	http://www.policyagendas.org/codebooks/senate.html
SubRMM	Sponsor is Ranking Minority of a subcommittee
SubR202	Sponsor is Ranking Minority on subcommittee of Committee on Agriculture	http://www.policyagendas.org/codebooks/senate.html
SubR203	Sponsor is Ranking Minority on subcommittee of Committee on Appropriations	http://www.policyagendas.org/codebooks/senate.html
SubR204	Sponsor is Ranking Minority on subcommittee of Committee on Armed Services	http://www.policyagendas.org/codebooks/senate.html
SubR205	Sponsor is Ranking Minority on subcommittee of Committee on Banking, Housing and Urban Affairs	http://www.policyagendas.org/codebooks/senate.html
SubR206	Sponsor is Ranking Minority on subcommittee of Committee on Budget	http://www.policyagendas.org/codebooks/senate.html
SubR207	Sponsor is Ranking Minority on subcommittee of Committee on Commerce, Science and Transportation	http://www.policyagendas.org/codebooks/senate.html
SubR208	Sponsor is Ranking Minority on subcommittee of Committee on Energy and Natural Resources	http://www.policyagendas.org/codebooks/senate.html
SubR209	Sponsor is Ranking Minority on subcommittee of Committee on Environment and Public Works	http://www.policyagendas.org/codebooks/senate.html
SubR211	Sponsor is Ranking Minority on subcommittee of Committee on Finance	http://www.policyagendas.org/codebooks/senate.html
SubR212	Sponsor is Ranking Minority on subcommittee of Committee on Foreign Relations	http://www.policyagendas.org/codebooks/senate.html
SubR213	Sponsor is Ranking Minority on subcommittee of Committee on Governmental Affairs	http://www.policyagendas.org/codebooks/senate.html
SubR216	Sponsor is Ranking Minority on subcommittee of Committee on Judiciary	http://www.policyagendas.org/codebooks/senate.html
SubR217	Sponsor is Ranking Minority on subcommittee of Committee on Health, Education, and Labor	http://www.policyagendas.org/codebooks/senate.html
SubR218	Sponsor is Ranking Minority on subcommittee of Committee on Rules and Administration	http://www.policyagendas.org/codebooks/senate.html
SubR219	Sponsor is Ranking Minority on subcommittee of Committee on Small Business	http://www.policyagendas.org/codebooks/senate.html
SubR220	Sponsor is Ranking Minority on subcommittee of Committee on Veterans	http://www.policyagendas.org/codebooks/senate.html
SubR224	Sponsor is Ranking Minority on subcommittee of Committee on Aeronautics and Space Science	http://www.policyagendas.org/codebooks/senate.html
SubR228	Sponsor is Ranking Minority on subcommittee of Committee Post Office and Civil Service	http://www.policyagendas.org/codebooks/senate.html
SubR229	Sponsor is Ranking Minority on subcommittee of Committee on District of Columbia	http://www.policyagendas.org/codebooks/senate.html
SubR250	Sponsor is Ranking Minority on subcommittee of Special Committee on Aging	http://www.policyagendas.org/codebooks/senate.html
SubR251	Sponsor is Ranking Minority on subcommittee of Select Committee on Ethics	http://www.policyagendas.org/codebooks/senate.html
SubR252	Sponsor is Ranking Minority on subcommittee of Select Committee on Indian Affairs	http://www.policyagendas.org/codebooks/senate.html
SubR253	Sponsor is Ranking Minority on subcommittee of Select Committee on Intelligence	http://www.policyagendas.org/codebooks/senate.html
